# Supplementary material for: Cohort Profile: National health insurance service-senior (NHIS-senior) cohort in Korea
Source: PubMed Central journal article supplement — BMJ Open. 2019 Jul 9;9(7):e024344. doi: 10.1136/bmjopen-2018-024344 (PMC6615810; doi:10.1136/bmjopen-2018-024344), 2019-07-09
Supplement: bmjopen-2018-024344supp001.pdf [file bmjopen-2018-024344supp001.pdf]

**Supplementary Table 1. Age- and sex-specific distributions of the National Health Insurance Service-Senior (NHIS-Senior) cohort at baseline (2002) and the entire Korean population in 2002**

| Age (years) | Sex   | Cohort population at baseline (2002) |       |              | The entire Korean population in 2002 * |       |
|-------------|-------|--------------------------------------|-------|--------------|----------------------------------------|-------|
|             |       | N                                    | %     | (95% CI)     | N                                      | %     |
| All         |       | 558,147                              | 100.0 |              | 5,725,238                              | 100.0 |
| 60-69       | Men   | 156,311                              | 28.0  | (27.9, 28.1) | 1,601,308                              | 28.0  |
|             | Women | 187,166                              | 33.5  | (33.4, 33.7) | 1,917,494                              | 33.5  |
| 70-79       | Men   | 58,156                               | 10.4  | (10.3, 10.5) | 598,191                                | 10.4  |
|             | Women | 100,718                              | 18.0  | (17.9, 18.1) | 1,034,907                              | 18.1  |
| 80-89       | Men   | 14,993                               | 2.7   | (2.6, 2.7)   | 152,953                                | 2.7   |
|             | Women | 35,181                               | 6.3   | (6.2, 6.4)   | 361,188                                | 6.3   |
| 90+         | Men   | 1,122                                | 0.2   | (0.2, 0.2)   | 11,867                                 | 0.2   |
|             | Women | 4,500                                | 0.8   | (0.8, 0.8)   | 47,330                                 | 0.8   |

\* The information on the entire Korean population came from Statistics of Residence Registration Population (Ministry of Security and Public Administration).

† The difference between the cohort population at baseline and the entire population was not statistically significant ( $p > 0.05$  by the 2-proportion Z-test).

**Supplementary table 2. The number of participants in the NHIS-Senior cohort database by year**

| Year | Eligibility DB <sup>1)</sup> |        | Health Screening DB <sup>2)</sup> |       | Healthcare utilization DB |       | Long-term care insurance DB <sup>3)</sup> |       |
|------|------------------------------|--------|-----------------------------------|-------|---------------------------|-------|-------------------------------------------|-------|
|      | N                            | %      | N                                 | %     | N                         | %     | N                                         | %     |
| 2002 | 558,147                      | 100.0% | 137,357                           | 24.6% | 469,800                   | 84.2% |                                           |       |
| 2003 | 557,195                      | 100.0% |                                   |       | 474,663                   | 85.2% |                                           |       |
| 2004 | 539,278                      | 100.0% | 157,275                           | 29.2% | 466,044                   | 86.4% |                                           |       |
| 2005 | 521,967                      | 100.0% |                                   |       | 487,928                   | 93.5% |                                           |       |
| 2006 | 504,417                      | 100.0% | 193,790                           | 38.3% | 482,542                   | 95.7% |                                           |       |
| 2007 | 487,460                      | 100.0% |                                   |       | 469,032                   | 96.2% |                                           |       |
| 2008 | 470,005                      | 100.0% | 206,443                           | 43.9% | 455,246                   | 96.9% | 32,484                                    | 6.9%  |
| 2009 | 452,631                      | 100.0% |                                   |       | 440,036                   | 97.2% | 37,177                                    | 8.2%  |
| 2010 | 436,395                      | 100.0% | 200,335                           | 45.9% | 425,990                   | 97.6% | 38,401                                    | 8.8%  |
| 2011 | 422,171                      | 100.0% |                                   |       | 410,751                   | 97.3% | 33,763                                    | 8.0%  |
| 2012 | 405,614                      | 100.0% | 177,592                           | 43.8% | 395,319                   | 97.5% | 33,306                                    | 8.2%  |
| 2013 | 388,493                      | 100.0% |                                   |       | 379,077                   | 97.6% | 35,533                                    | 9.1%  |
| 2014 | 369,307                      | 100.0% | 163,675                           | 44.3% | 362,502                   | 98.2% | 36,204                                    | 9.8%  |
| 2015 | 352,869                      | 100.0% |                                   |       | 346,839                   | 98.3% | 36,773                                    | 10.4% |

1) The loss of eligibility is due to death of participants.

2) The health screening program is performed every two years for participants.

3) Long-term care insurance was introduced in 2008.

**Supplementary Table 3. Crude and age-standardised health care utilisation rates (with the Korean 2005 census and world standard populations as references, per 100 person-years) of major 10 diseases based on the health care utilisation database of the National Health Insurance Service-Senior (NHIS-Senior) cohort (at baseline year, 2002)**

| Rank | All                                                                        |             |                        | Men  |                                                                            |             | Women                  |      |                                                                            |             |                        |      |
|------|----------------------------------------------------------------------------|-------------|------------------------|------|----------------------------------------------------------------------------|-------------|------------------------|------|----------------------------------------------------------------------------|-------------|------------------------|------|
|      | ICD-10 Code                                                                | Crude rates | Age-standardised rates |      | ICD-10 code                                                                | Crude rates | Age-standardised rates |      | ICD-10 code                                                                | Crude rates | Age-standardised rates |      |
|      |                                                                            |             | Census                 | WHO  |                                                                            |             | Census                 | WHO  |                                                                            |             | Census                 | WHO  |
| 1    | <b>Acute upper respiratory infections and influenza (J00-J11)</b>          | 76.6        | 76.2                   | 75.2 | <b>Acute upper respiratory infections and influenza (J00-J11)</b>          | 63.1        | 62.4                   | 61.8 | <b>Acute upper respiratory infections and influenza (J00-J11)</b>          | 86.1        | 86.9                   | 85.7 |
| 2    | <b>Disorders of teeth and supporting structures (K00-K08)</b>              | 42.0        | 41.5                   | 40.8 | <b>Disorders of teeth and supporting structures (K00-K08)</b>              | 48.8        | 47.2                   | 46.6 | <b>Disorders of teeth and supporting structures (K00-K08)</b>              | 37.3        | 37.6                   | 37.1 |
| 3    | <b>Other diseases of the eye and adnexa (H00-H59, except H25-H26, H28)</b> | 31.2        | 31.2                   | 30.8 | <b>Other diseases of the eye and adnexa (H00-H59, except H25-H26, H28)</b> | 24.6        | 24.8                   | 24.6 | <b>Other diseases of the eye and adnexa (H00-H59, except H25-H26, H28)</b> | 35.8        | 36.1                   | 35.6 |
| 4    | <b>Hypertensive diseases (I10-I15)</b>                                     | 24.4        | 24.7                   | 24.5 | <b>Hypertensive diseases (I10-I15)</b>                                     | 20.8        | 21.3                   | 21.2 | <b>Hypertensive diseases (I10-I15)</b>                                     | 26.9        | 27.1                   | 26.9 |
| 5    | <b>Other arthropathies (M00-M15, M18-M22, M24-M25)</b>                     | 18.1        | 18.4                   | 18.2 | <b>Dermatitis, eczema and papulosquamous disorders (L20-L45)</b>           | 17.0        | 17.1                   | 17.1 | <b>Other arthropathies (M00-M15, M18-M22, M24-M25)</b>                     | 22.5        | 22.7                   | 22.4 |
| 6    | <b>Dorsalgia (M54)</b>                                                     | 16.2        | 16.4                   | 16.2 | <b>Other injuries (S10-S51, S53-S71, S73-S81, S83-T14,</b>                 | 15.3        | 15.0                   | 14.9 | <b>Dorsalgia (M54)</b>                                                     | 19.7        | 19.9                   | 19.7 |

|    |                                                                  |      |      |      |                                                                       |      |      |      |                                                                       |      |      |      |
|----|------------------------------------------------------------------|------|------|------|-----------------------------------------------------------------------|------|------|------|-----------------------------------------------------------------------|------|------|------|
| 7  | <b>Other injuries (S10-S51, S53-S71, S73-S81, S83-T14, T79)</b>  | 16.1 | 16.0 | 15.9 | <b>T79)<br/>Other acute lower respiratory infections (J20-J22)</b>    | 14.1 | 14.0 | 13.9 | <b>Gonarthrosis [arthrosis of knee] (M17)</b>                         | 19.2 | 19.5 | 19.2 |
| 8  | <b>Soft tissue disorders (M60-M79)</b>                           | 15.7 | 15.7 | 15.5 | <b>Diabetes mellitus (E10-E14)</b>                                    | 13.6 | 13.4 | 13.2 | <b>Soft tissue disorders (M60-M79)</b>                                | 17.4 | 17.6 | 17.3 |
| 9  | <b>Other acute lower respiratory infections (J20-J22)</b>        | 15.4 | 15.3 | 15.1 | <b>Soft tissue disorders (M60-M79)</b>                                | 13.2 | 13.1 | 13.0 | <b>Dyspepsia and other diseases of stomach and duodenum (K29-K31)</b> | 16.8 | 17.0 | 16.8 |
| 10 | <b>Dermatitis, eczema and papulosquamous disorders (L20-L45)</b> | 15.3 | 15.3 | 15.2 | <b>Dyspepsia and other diseases of stomach and duodenum (K29-K31)</b> | 12.9 | 12.9 | 12.8 | <b>Other injuries (S10-S51, S53-S71, S73-S81, S83-T14, T79)</b>       | 16.6 | 16.7 | 16.6 |

\* Disease codes were classified according to the International Shortlist for Hospital Morbidity Tabulation recommended by the World Health Organisation (WHO) and the Organisation for Economic Co-operation and Development. ICD, International Classification of Diseases.

**Supplementary Table 4. Crude and age-standardised admission rates (with the Korean 2005 census and world standard populations as references, per 100,000 person-years) of major 10 diseases based on the health care utilisation database of the National Health Insurance Service-Senior (NHIS-Senior) cohort (at baseline year, 2002)**

| Rank | All                                                                    |             |                        |        | Men                                                             |             |                        |        | Women                                                           |             |                        |        |
|------|------------------------------------------------------------------------|-------------|------------------------|--------|-----------------------------------------------------------------|-------------|------------------------|--------|-----------------------------------------------------------------|-------------|------------------------|--------|
|      | ICD-10 Code                                                            | Crude rates | Age-standardised rates |        | ICD-10 code                                                     | Crude rates | Age-standardised rates |        | ICD-10 code                                                     | Crude rates | Age-standardised rates |        |
|      |                                                                        |             | Census                 | WHO    |                                                                 |             | Census                 | WHO    |                                                                 |             | Census                 | WHO    |
| 1    | <b>Cataract (H25-H26, H28)</b>                                         | 1604.4      | 1679.9                 | 1675.2 | <b>Cataract (H25-H26, H28)</b>                                  | 1245.2      | 1375.4                 | 1385.8 | <b>Cataract (H25-H26, H28)</b>                                  | 1857.4      | 1884.4                 | 1870.3 |
| 2    | <b>Cerebrovascular diseases (I60-I69)</b>                              | 711.7       | 734.8                  | 734.2  | <b>Other malignant neoplasms (remainder of C00-C97)</b>         | 1027.0      | 1033.1                 | 1015.7 | <b>Other injuries (S10-S51, S53-S71, S73-S81, S83-T14, T79)</b> | 680.5       | 684.2                  | 684.4  |
| 3    | <b>Other malignant neoplasms (remainder of C00-C97)</b>                | 644.1       | 647.4                  | 636.1  | <b>Cerebrovascular diseases (I60-I69)</b>                       | 757.3       | 817.8                  | 818.9  | <b>Cerebrovascular diseases (I60-I69)</b>                       | 679.6       | 684.0                  | 683.5  |
| 4    | <b>Other injuries (S10-S51, S53-S71, S73-S81, S83-T14, T79)</b>        | 611.2       | 624.9                  | 625.4  | <b>the circulatory system (remainder of I00-I99)</b>            | 513.5       | 496.7                  | 491.2  | <b>Other malignant neoplasms (remainder of C00-C97)</b>         | 374.5       | 379.2                  | 373.5  |
| 5    | <b>Other diseases of the circulatory system (remainder of I00-I99)</b> | 374.9       | 368.2                  | 363.8  | <b>Other injuries (S10-S51, S53-S71, S73-S81, S83-T14, T79)</b> | 512.6       | 518.8                  | 517.9  | <b>Diabetes mellitus (E10-E14)</b>                              | 367.8       | 373.6                  | 368.0  |
| 6    | <b>Diabetes mellitus (E10-E14)</b>                                     | 349.5       | 354.8                  | 351.2  | <b>Angina pectoris (I20)</b>                                    | 359.5       | 358.4                  | 351.5  | <b>Deforming dorsopathies and spondylopathies (M40-M49)</b>     | 322.9       | 326.4                  | 322.5  |
| 7    | <b>Angina pectoris (I20)</b>                                           | 297.0       | 297.6                  | 292.2  | <b>Chronic obstructive pulmonary disease</b>                    | 325.3       | 366.6                  | 372.6  | <b>the circulatory system (remainder of I00-I99)</b>            | 277.3       | 278.5                  | 275.5  |

|    |                                                                                            |       |       |       |                                                                                |       |       |       |                                                       |       |       |       |
|----|--------------------------------------------------------------------------------------------|-------|-------|-------|--------------------------------------------------------------------------------|-------|-------|-------|-------------------------------------------------------|-------|-------|-------|
|    |                                                                                            |       |       |       | <b>and bronchiectasis<br/>(J40-J44, J47)</b>                                   |       |       |       |                                                       |       |       |       |
| 8  | <b>Deforming<br/>dorsopathies and<br/>spondylopathies<br/>(M40-M49)</b>                    | 282.3 | 286.0 | 283.7 | <b>Diabetes mellitus<br/>(E10-E14)</b>                                         | 323.6 | 326.7 | 327.1 | <b>Gonarthrosis<br/>[arthrosis of knee]<br/>(M17)</b> | 256.3 | 262.9 | 255.5 |
| 9  | <b>Pneumonia (J12-<br/>J18)</b>                                                            | 242.5 | 251.4 | 255.7 | <b>Pneumonia (J12-<br/>J18)</b>                                                | 302.3 | 341.0 | 348.3 | <b>Angina pectoris<br/>(I20)</b>                      | 252.9 | 256.0 | 251.9 |
| 10 | <b>Chronic obstructive<br/>pulmonary disease<br/>and bronchiectasis<br/>(J40-J44, J47)</b> | 212.6 | 222.0 | 223.6 | <b>Malignant<br/>neoplasms of<br/>trachea, bronchus<br/>and lung (C33-C34)</b> | 286.3 | 292.6 | 289.3 | <b>Hypertensive<br/>diseases (I10-I15)</b>            | 213.8 | 214.4 | 215.7 |

\* Disease codes were classified according to the International Shortlist for Hospital Morbidity Tabulation recommended by the World Health Organisation (WHO) and the Organisation for Economic Co-operation and Development. ICD, International Classification of Diseases.

**Supplementary Table 5. Judgment results and functional impairment score of long-term care service database in the National Health Insurance Service-Senior (NHIS-Senior) cohort (at baseline year, 2008)**

|                                    |              | N      | %      |
|------------------------------------|--------------|--------|--------|
| <b>Number of applicants</b>        |              | 34,483 | 100.0% |
| <b>Judgment results*</b>           | First grade  | 6,161  | 17.9%  |
|                                    | Second grade | 5,786  | 16.8%  |
|                                    | Third grade  | 9,682  | 28.1%  |
|                                    | Non-rating   | 5,228  | 15.2%  |
|                                    | Dismissal    | 7,626  | 22.1%  |
| <b>Functional impairment score</b> |              |        |        |
| Physical function                  | 0            | 3,665  | 10.6%  |
|                                    | 1-19         | 3,864  | 11.2%  |
|                                    | 20-39        | 8,794  | 25.5%  |
|                                    | 40-59        | 10,270 | 29.8%  |
|                                    | 60-79        | 4,473  | 13.0%  |
|                                    | 80+          | 3,417  | 9.9%   |
| Cognitive function                 | 0            | 2,196  | 6.4%   |
|                                    | 1-19         | 4,545  | 13.2%  |
|                                    | 20-39        | 5,341  | 15.5%  |
|                                    | 40-59        | 9,697  | 28.1%  |
|                                    | 60-79        | 5,180  | 15.0%  |
|                                    | 80+          | 7,524  | 21.8%  |
| Behavioural change score           | 0            | 18,720 | 54.3%  |
|                                    | 1-19         | 5,285  | 15.3%  |
|                                    | 20-39        | 6,722  | 19.5%  |
|                                    | 40-59        | 3,340  | 9.7%   |
|                                    | 60+          | 416    | 1.2%   |
| Nursing care score                 | 0            | 30,331 | 88.0%  |
|                                    | 1-19         | 3,147  | 9.1%   |
|                                    | 20-39        | 576    | 1.7%   |
|                                    | 40+          | 429    | 1.2%   |
| Rehabilitation score               | 0            | 9,878  | 28.6%  |

|       |        |       |
|-------|--------|-------|
| 1-19  | 6,718  | 19.5% |
| 20-39 | 10,669 | 30.9% |
| 40-59 | 5,247  | 15.2% |
| 60+   | 1,448  | 4.2%  |

---

\* Grade 1: A person who is completely dependent on the help of another person to go about daily life (overall functional impairment score over 95).

Grade 2: A person who is mostly dependent on the help of another person to go about daily life (overall functional impairment score between 75 and 95).

Grade 3: A person who is in partial need of the help of another person to go about daily life (overall functional impairment score between 51 and 75).
